# Supplementary material for: Accelerated ageing and renal dysfunction links lower socioeconomic status and dietary phosphate intake
Source: PubMed Central journal article supplement (PMC4931858; doi:10.18632/aging.100948), 2016-04-26
Supplement: aging-08-1135-s001.pdf [file aging-08-1135-s001.pdf]

## SUPPLEMENTARY TABLE

**Supplementary Table 1.** Analysis of phosphate levels versus telomere length, DNA methylation content, and biochemical parameters with data adjusted for smoking status, alcohol consumption. Analysis adjusted for the multiple comparisons using the Benjamini-Hochberg method. eGFR - estimated glomerular filtration rate, BP-Blood pressure

| Adjustment Covariates  | Relative Telomere length                            | Global DNA methylation                             | Adiponectin                                        | Cholesterol                                        | Interleukin 6                                    | eGFR (comb.ckdepi)                                    | D -dimers                                       | Vitamin D                                           |
|------------------------|-----------------------------------------------------|----------------------------------------------------|----------------------------------------------------|----------------------------------------------------|--------------------------------------------------|-------------------------------------------------------|-------------------------------------------------|-----------------------------------------------------|
| <b>Regular smoking</b> | (n=360)<br>r=-0.142 (-0.242 to -0.04)<br>p=0.046*   | (n=229)<br>r=-0.234 (-0.353 to -0.107)<br>p=0.016* | (n=586)<br>r=0.114 (0.033 to 0.193)<br>p=0.046*    | (n=589)<br>r=0.101 (0.02 to 0.18)<br>p=0.057       | (n=574)<br>r=0.106 (0.024 to 0.186)<br>p=0.052   | (n=582)<br>r=-0.117 (-0.197 to -0.036)<br>p=0.046*    | (n=583)<br>r=0.121 (0.04 to 0.2)<br>p=0.046*    | (n=570)<br>r=-0.08 (-0.161 to 0.002)<br>p=0.164     |
| <b>Alcohol</b>         | (n=360)<br>r=-0.484 (-0.559 to -0.401)<br>p=0.42943 | (n=229)<br>r=-0.532 (-0.619 to -0.432)<br>p=0.429  | (n=586)<br>r=0.426 (0.357 to 0.49)<br>p=0.251      | (n=589)<br>r=0.424 (0.355 to 0.488)<br>p=0.251     | (n=574)<br>r=0.431 (0.362 to 0.496)<br>p=0.251   | (n=582)<br>r=-0.431 (-0.495 to -0.363)<br>p=0.251     | (n=583)<br>r=0.424 (0.355 to 0.488)<br>p=0.251  | (n=570)<br>r=-0.425 (-0.49 to -0.356)<br>p=0.251    |
| <b>High BP</b>         | (n=357)<br>r=-0.131 (-0.232 to -0.028)<br>p=0.136   | (n=227)<br>r=-0.166 (-0.29 to -0.037)<br>p=0.097   | (n=583)<br>r=0.104 (0.023 to 0.184)<br>p=0.136     | (n=586)<br>r=0.089 (0.008 to 0.169)<br>p=0.224     | (n=571)<br>r=0.123 (0.041 to 0.203)<br>p=0.097   | (n=579)<br>r=-0.127 (-0.206 to -0.046)<br>p=0.097     | (n=580)<br>r=0.126 (0.045 to 0.205)<br>p=0.097  | (n=567)<br>r=-0.083 (-0.164 to -0.001)<br>p=0.272   |
| <b>Cancer</b>          | (n=357)<br>r=-0.193 (-0.291 to -0.091)<br>p=0.004** | (n=227)<br>r=-0.179 (-0.302 to -0.05)<br>p=0.026*  | (n=583)<br>r=0.182 (0.102 to 0.259)<br>p=0.0008*** | (n=586)<br>r=0.196 (0.117 to 0.272)<br>p=0.0004*** | (n=571)<br>r=0.163 (0.082 to 0.242)<br>p=0.002** | (n=579)<br>r=-0.177 (-0.255 to -0.097)<br>p=0.0008*** | (n=580)<br>r=0.172 (0.092 to 0.25)<br>p=0.001** | (n=567)<br>r=-0.158 (-0.237 to -0.077)<br>p=0.003** |
| <b>Diabetes</b>        | (n=357)<br>r=-0.129 (-0.23 to -0.026)<br>p=0.065    | (n=227)<br>r=-0.175 (-0.299 to -0.046)<br>p=0.054  | (n=583)<br>r=0.125 (0.044 to 0.204)<br>p=0.054     | (n=586)<br>r=0.112 (0.032 to 0.191)<br>p=0.068     | (n=571)<br>r=0.127 (0.045 to 0.207)<br>p=0.054   | (n=579)<br>r=-0.131 (-0.21 to -0.05)<br>p=0.054       | (n=580)<br>r=0.136 (0.055 to 0.215)<br>p=0.054  | (n=567)<br>r=-0.102 (-0.183 to -0.02)<br>p=0.118    |
