# Supplementary material for: Accelerated ageing and renal dysfunction links lower socioeconomic status and dietary phosphate intake
Source: publisher site journal article supplement (doi:10.18632/aging.100948), 2016-04-26
Supplement: Supplementary file 2 [file aging-v8i5-100948-supplementary-material-SD1.docx]

Apache Tomcat/6.0.26 - Error report 

# HTTP Status 404 - No response action for uri: /papers/v100948/SupTable.docx/nundefined/full/undefined

---

**type** Status report

**message** No response action for uri: /papers/v100948/SupTable.docx/nundefined/full/undefined

**description** The requested resource (No response action for uri: /papers/v100948/SupTable.docx/nundefined/full/undefined) is not available.

---

### Apache Tomcat/6.0.26
